# Supplementary material for: Modulation of the gut microbiota by probiotics and symbiotics is associated with changes in serum metabolite profile related to a decrease in inflammation and overall benefits to metabolic health: a double-blind randomized controlled clinical trial in women with obesity
Source: Royal Society of Chemistry journal article supplement (doi:10.1039/d0fo02748k), 2021-01-01
Supplement: d0fo02748k1.pdf [file d0fo02748k1.pdf]

Supplementary material

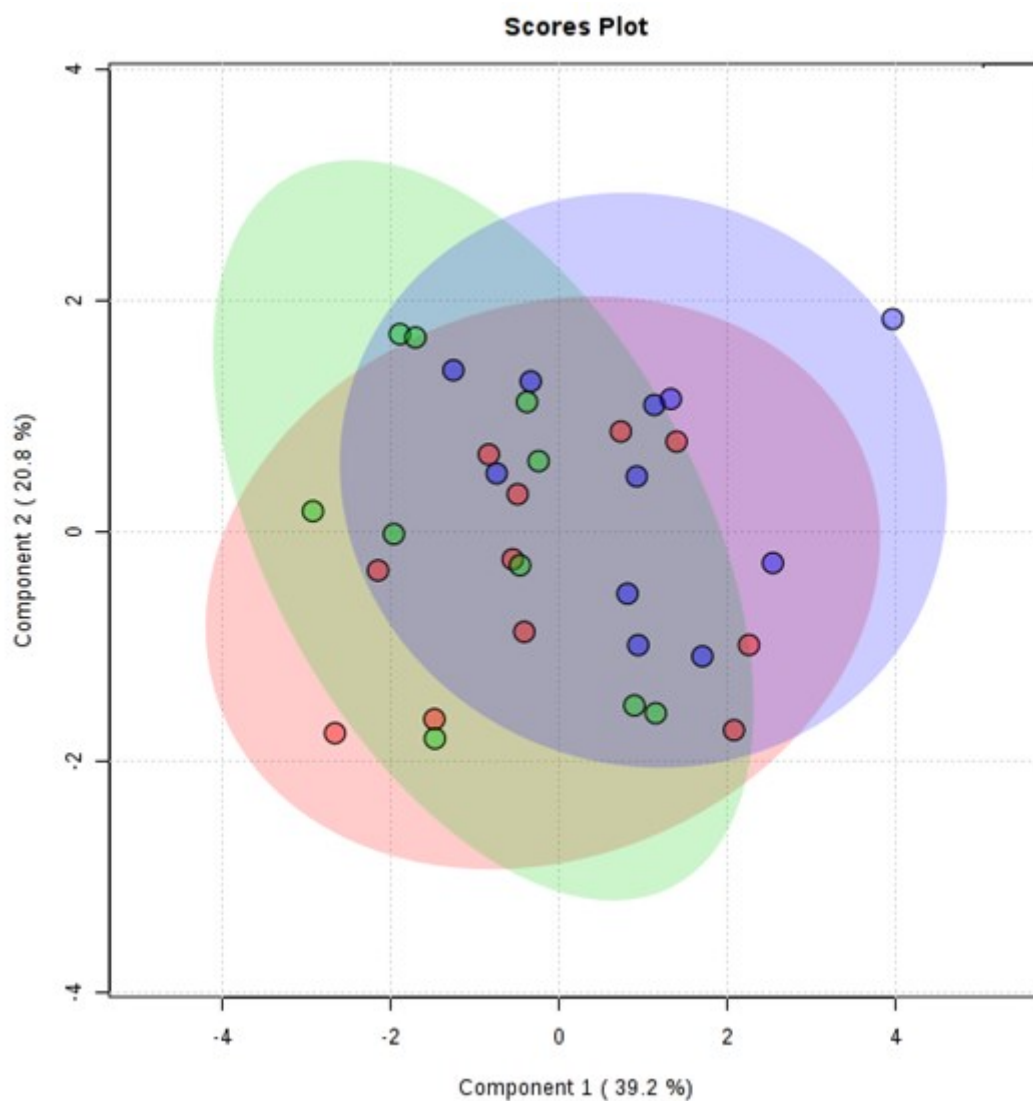

**Figure 1.** Comparison of Partial Least Square Discriminant Analysis (PLS-DA) in metabolites between groups

Legend: ● CG (control group); ● PG (probiotic group), ● SG (symbiotic group).
